# Supplementary material for: TBC1D32 variants disrupt retinal ciliogenesis and cause retinitis pigmentosa
Source: PubMed Central journal article supplement (PMC10721274; doi:10.1172/jci.insight.169426), 2023-11-08
Supplement: jciinsight-8-169426-s081.pdf [file jciinsight-8-169426-s081.pdf]

**Table S1. Ophthalmological data of the four affected patients from three unrelated families**

|                                         | <b>First symptom</b><br>Age of onset | <b>First exam</b><br>Age<br>Visual acuity<br>Visual field                  | <b>Last exam</b><br>Age<br>Visual acuity<br>Visual field                                                                                | <b>Refraction</b>                                                 | <b>Final SD-OCT</b>                                                                                                                | <b>Final SW-FAF</b>                                                                                                            | <b>ERG</b>                             |
|-----------------------------------------|--------------------------------------|----------------------------------------------------------------------------|-----------------------------------------------------------------------------------------------------------------------------------------|-------------------------------------------------------------------|------------------------------------------------------------------------------------------------------------------------------------|--------------------------------------------------------------------------------------------------------------------------------|----------------------------------------|
| <b>Patient 1</b><br>Family 1<br>French  | Night blindness<br>Childhood         | 12 years<br><b>RE</b> 6/10<br><b>LE</b> 5/10<br>No peripheral constriction | 19 years<br><b>RE</b> 6/10, <b>LE</b> 5/10<br><b>RE</b> = 30° (T,N,I,S)<br><b>LE</b> = 30° (T,N,I,S)                                    | <b>RE</b> -3 (-2 at 20°)<br><b>LE</b> -5 (-3 at 175°)             | Large macular preservation                                                                                                         | Subtle large annular ring<br><br>Hypoautofluorescent atrophic spots in the mid periphery of the retina                         | Rod and cone responses not discernable |
| <b>Patient 2</b><br>Family 2<br>Italian | Night blindness<br>Childhood         | 34 years<br><b>RE</b> 9/10<br><b>LE</b> 9/10                               | 36 years<br><b>RE</b> 9/10, <b>LE</b> 9/10<br><b>RE</b> 20° (T), 35° (N), 20° (I), 10° (S)<br><b>LE</b> 10°(T), 15°(N), 20° (I), 10°(S) | <b>RE</b> -7.25 (-2.75 at 10°)<br><b>LE</b> -6.75 (-2.75 at 180°) | Central island of preserved retinal architecture<br><br>Gradual disappearance of outer retinal layers with increasing eccentricity | Hyperautofluorescent perifoveal ring<br><br>Multiple peripheral hypoautofluorescent spots beyond the temporal vascular arcades | Rod and cone responses not discernable |
| <b>Patient 3</b><br>Family 3<br>Spanish | Night blindness<br>20 years          | 25 years<br>N/A                                                            | 54 years<br><b>RE</b> 1/10, <b>LE</b> 1/20<br>Tunnel vision<br><b>RE</b> 5°, <b>LE</b> 10°                                              | <b>RE</b> +0.25 (-0.75 at 39°)<br><b>LE</b> +1.25 (-1.25 at 50°)  | Atrophy with thinning of the retinal neuroepithelium also affecting the central retina                                             | N/A                                                                                                                            | Rod and cone responses not discernable |
| <b>Patient 4</b><br>Family 3<br>Spanish | Night blindness<br>20 years          | 30 years                                                                   | 59 years<br><b>RE</b> 1/10, <b>LE</b> 1/10<br>Tunnel vision<br><b>RE</b> 5°, <b>LE</b> 10°                                              | <b>RE</b> +6.5 (-1.25 at 35°)<br><b>LE</b> +6 (-1.25 at 150°)     | Atrophy with thinning of the retinal neuroepithelium also affecting the central retina                                             | N/A                                                                                                                            | Rod and cone responses not discernable |

ERG – electroretinogram; T – temporal, N – nasal, I – inferior, S – superior; N/A – not available

**Table S2. *Xenopus* morpholino and primer sequences**

| Morpholino             | Sequence                                |
|------------------------|-----------------------------------------|
| <i>Tbc1d32</i> -MO-1   | TTTTTGACGGGACGGTCCAGATTTT               |
| <i>Tbc1d32</i> -MO-2   | CTTCAAAGGCAGCGTCGCCCAAGAG               |
| Standard control-MO    | CCTCTTACCTCAGTTACAATTTATA               |
| <i>Tbc1d32</i> forward | TCAAGGCCT-CTCGAG-ATG-TCTCATTTTTCTTCTGAG |
| <i>Tbc1d32</i> reverse | GTTCTAGAGG-CTCGAG-TCA-TTGTATTACAGAG     |

**Table S3. Human *TBC1D32* gDNA amplification and sequencing primer sequences**

| Target         | Experiment                         | Forward primer            | Reverse primer        |
|----------------|------------------------------------|---------------------------|-----------------------|
| <i>TBC1D32</i> | Amplification exon 2               | TAACCTGCTGAAGTTTGGGC      | AAGCCTTTGGAGAGTCTGGG  |
|                | Amplification exon 7               | TCTCTATTCTATTCTTGTGAGA    | ATGGAGCTTCTTTCTGATA   |
|                | Sequencing exon 2                  |                           | AAGCCTTTGGAGAGTCTGGG  |
|                | Sequencing exon 7                  | TCTCTATTCTATTCTTGTGAGA    |                       |
|                | Amplification & sequencing exon 1  | TTCTCTGGACCTCTCTGGA       | GTTTTCCGAAATGACGCACT  |
|                | Amplification & sequencing exon 11 | ACAGCATCATTAGTAAAAGTGACCT | GGCTGAGCTTTAAGGGCTAGA |

**Table S4. *Xenopus* and human RT-PCR and/or qPCR primer sequences**

| <i>Xenopus</i> target | Experiment | Forward primer        | Reverse primer         |
|-----------------------|------------|-----------------------|------------------------|
| <i>ef1a</i>           | qPCR       | TGGTGGCATCGACAAGAGAAC | CCACGTTACGCTCTGCCTTC   |
| <i>ihh</i>            | qPCR       | GCAGTCGACATCACCACATC  | CTGACTTCACCGAGCAATGG   |
| <i>mitf</i>           | qPCR       | CATTAACGTCTCCAGCAGCC  | TGTTTGGCCGTAGTCAGGTA   |
| <i>odc</i>            | qPCR       | GCTTCTGGAGCGGGCAAAGGA | CCAAGCTCAGCCCCATGTCA   |
| <i>rpl8</i>           | qPCR       | CCACGTGTCGGTGTGGCTA   | GCGCAGACGACCAGTACGACGA |
| <i>tbc1d32</i>        | qPCR       | GGAGGCAATGCAAACTCT    | CCGCAAAATCCGCTCTGTAA   |

| Human target   | Experiment         | Forward primer        | Reverse primer           |
|----------------|--------------------|-----------------------|--------------------------|
| <i>TBC1D32</i> | RT-PCR exons 1-5   | GGCCCATTTCTCCAGCGA    | ATCCGGTCACTAAACACAGG     |
|                | RT-PCR exons 1-8   | GGCCCATTTCTCCAGCGA    | CTCTGGATGACGAATCCAGAAAAG |
|                | RT-PCR exons 6-11  | CTCTGCGAAAACTGACCGTG  | TCTGCTTGTCTGCAATGCT      |
|                | RT-PCR exons 10-12 | TGGATGCATGCACATTATAGC | TGAGGGATACCAAACCTTTTT    |
|                | qPCR               | TGCCACCCCAAAGGATTAC   | TTAGTGCAATGCCACCTGCT     |
| <i>ZO1</i>     | qPCR               | TAAGCCAGCCTCTCAACAGAA | AGAGGTGGAAGGAGCTGGG      |
| <i>MERTK</i>   | qPCR               | CTGCAGCTAGAAAACTCTT   | GAGGCAATTATAGAGTCAGG     |
| <i>LRAT</i>    | qPCR               | AAACCAGCTCTTCCACCGA   | TGAGACGCTTGTGGAGACC      |
| <i>RPE65</i>   | qPCR               | TCTTTGCAACTATGTCTCTG  | TTATTGGATCTTCTTGTCT      |
| <i>ABCA4</i>   | qPCR               | AGCCATGTTGGAGGACACAG  | AGCAGATCCAGATTGAGCG      |
| <i>RLBP1</i>   | qPCR               | GAAATCACCTTTGATGAGAT  | TCTTCTGAGATCTGAAGTC      |
| <i>CDH1</i>    | qPCR               | CGGACGATGATGTGAACACC  | TTGCTGTTGTGCTTAACCCC     |
| <i>CDH2</i>    | qPCR               | CGGTTTCATTTGAGGGCACA  | TTGGAGCCTGAGACACGATT     |
| <i>CDH3</i>    | qPCR               | GAAGCTGGCAGACATGTACG  | AAGCCACCACTCTAACGTCA     |
| <i>CTNNB1</i>  | qPCR               | CTTACACCCACCATCCCACT  | CCTCCACAAATTGCTGCTGT     |
| <i>FN1</i>     | qPCR               | CCCCATTCCAGGACACTTCT  | TGCCTCCACTATGACGTTGT     |
| <i>SNAI1</i>   | qPCR               | AGTGGTTCTTCTGCGCTACT  | GTAGGGCTGCTGGAAGGTAA     |
| <i>NANOG</i>   | qPCR               | CAAAGGCAAACAACCCACTT  | TCTGCTGGAGGCTGAGGTAT     |
| <i>OCT3/4</i>  | qPCR               | GTACTCCTCGGTCCCTTTCC  | CAAAAACCTGGCACAACCT      |
| <i>LIN28a</i>  | qPCR               | GGGGAATCACCTACAACCT   | CTTGGCTCCATGAATCTGGT     |
| <i>GAPDH</i>   | qPCR               | AACCATGAGAAGTATGACAAC | CTTCCACGATACCAAAGTT      |

**Table S5: *Xenopus* primary and secondary antibodies**

| <b>Primary antibodies</b>     | <b>Host</b> | <b>Clonality</b> | <b>Dilution</b> | <b>Company</b>       | <b>Catalogue #</b> |
|-------------------------------|-------------|------------------|-----------------|----------------------|--------------------|
| anti-acetylated alpha-Tubulin | Mouse       | Monoclonal       | 1/500           | Sigma-Aldrich        | T6793              |
| anti-Arl13B                   | Rabbit      | Polyclonal       | 1/200           | Proteintech          | 17711-1-AP         |
| anti-cleaved Caspase 3        | Rabbit      | Polyclonal       | 1/200           | Cell signaling       | 9661S              |
| anti-gamma-Tubulin            | Mouse       | Monoclonal       | 1/200           | Anticorps-enligne.fr | ABIN207111         |
| anti M-Opsin                  | Rabbit      | Polyclonal       | 1/500           | Sigma-Aldrich        | AB5405             |
| anti-S-Opsin                  | Rabbit      | Polyclonal       | 1/500           | Sigma-Aldrich        | AB5407             |
| anti-Otx2                     | Rabbit      | Monoclonal       | 1/100           | Abcam                | AB183951           |
| anti-Rhodopsin                | Mouse       | Monoclonal       | 1/1000          | Sigma-Aldrich        | MABN15             |

| <b>Secondary antibodies</b>     | <b>Host</b> | <b>Dilution</b> | <b>Company</b>          | <b>Catalogue #</b> |
|---------------------------------|-------------|-----------------|-------------------------|--------------------|
| anti-mouse IgG Alexa Fluor 488  | Goat        | 1/1000          | ThermoFisher Scientific | A11001             |
| anti-mouse IgG1 Alexa Fluor 488 | Goat        | 1/300           | ThermoFisher Scientific | A21121             |
| anti-rabbit IgG Alexa Fluor 488 | Goat        | 1/1000          | ThermoFisher Scientific | A11008             |
| anti-rabbit IgG Alexa Fluor 546 | Goat        | 1/300           | ThermoFisher Scientific | A11010             |
| anti-mouse IgG Alexa Fluor 594  | Goat        | 1/1000          | ThermoFisher Scientific | A11005             |
| anti-rabbit IgG Alexa Fluor 594 | Goat        | 1/1000          | ThermoFisher Scientific | A11012             |
| anti-mouse IgG Alexa Fluor 647  | Goat        | 1/500           | ThermoFisher Scientific | A21240             |

**Table S6: Human primary and secondary antibodies**

| Primary antibodies                           | Host       | Clonality  | Dilution             | Company                                                   | Cat #         |
|----------------------------------------------|------------|------------|----------------------|-----------------------------------------------------------|---------------|
| anti-ABCA4, clone 3F4                        | Mouse      | Monoclonal | 1/200                | Abcam                                                     | ab77285       |
| anti-acetylated alpha-Tubulin, clone 6-11B-1 | Mouse      | Monoclonal | 1/2000               | Sigma-Aldrich                                             | T7451         |
| anti-AFP, clone 1G7                          | Mouse      | Monoclonal | 1/200                | Sigma-Aldrich                                             | WH0000174M1   |
| anti-ARL13B                                  | Rabbit     | Polyclonal | 1/3000               | Proteintech                                               | 17711-1-AP    |
| anti-β-actin, clone AC-74                    | Mouse      | Monoclonal | 1/500 (WB)           | Sigma-Aldrich                                             | A5316         |
| anti-Arrestin 3                              | Goat       | Polyclonal | 1/200                | Novus Biologicals                                         | NBP1-37003    |
| anti-β-catenin, clone 14                     | Mouse      | Monoclonal | 1/1000 (WB)          | BD Transduction Laboratories                              | 610154        |
| anti-CRALBP, clone B2                        | Mouse      | Monoclonal | 1/1000               | Abcam                                                     | ab15051       |
| anti-CRALBP                                  | Rabbit     |            | 1/1000 (WB)          | Proteintech                                               |               |
| anti-CRX, clone 4G11                         | Mouse      | Monoclonal | 1/2000               | Abnova                                                    | H00001406-M02 |
| anti-E-cadherin, clone 2410E                 | Rabbit     | Monoclonal | 1/1000 (WB)          | Cell Signaling Technology                                 | 3195          |
| anti-GAFP                                    | Rabbit     | Polyclonal | 1/200                | Agilent Dako                                              | Z0334         |
| anti-GRK1, clone G8                          | Mouse      | Monoclonal | 1/500                | ThermoFisher Scientific                                   | MA1-720       |
| anti-GT335                                   | Mouse      | Monoclonal | 1/2000               | AdipoGen                                                  | AG-20B-0020   |
| anti-IFT88                                   | Rabbit     | Polyclonal | 1/500                | Proteintech                                               | 13967-1-AP    |
| anti-MERTK, clone Y323                       | Rabbit     | Monoclonal | 1/250                | Abcam                                                     | ab52968       |
| anti-Nanog                                   | Rabbit     | Polyclonal | 1/200                | Abcam                                                     | ab21624       |
| anti-N-cadherin, clone D4R1H                 | Rabbit     | Monoclonal | 1/200<br>1/1000 (WB) | Cell Signaling Technology                                 | 13116         |
| anti-OCT3/4, clone C-10                      | Mouse      | Monoclonal | 1/200                | Santa Cruz Biotechnology                                  | sc-5279       |
| anti-Opn red/green                           | Rabbit     | Polyclonal | 1/500                | Millipore                                                 | AB5405        |
| anti-P-cadherin, clone 56                    | Mouse      | Monoclonal | 1/250 (WB)           | BD Transduction Laboratories                              | 610228        |
| anti-PDE6B                                   | Rabbit     | Polyclonal | 1/1000               | Proteintech                                               | 22063-1-AP    |
| anti-Perilipin-2                             | Guinea Pig | Polyclonal | 1/1000 (WB)          | Progen                                                    | GP47          |
| anti-Pericentrin                             | Mouse      | Monoclonal | 1/1000               | Abcam                                                     | ab28144       |
| anti-Recoverin                               | Rabbit     | Polyclonal | 1/2000               | Millipore                                                 | AB5585        |
| anti-Rhodopsin, clone 4D2                    | Mouse      | Monoclonal | 1/500                | Millipore                                                 | MABN15        |
| anti-SMA, clone 1A4                          | Mouse      | Monoclonal | 1/200                | Agilent Dako                                              | M0851         |
| anti-SOX2                                    | Rabbit     | Polyclonal | 1/200                | ThermoFisher Scientific                                   | 48-1400       |
| anti-TBC1D32                                 | Rabbit     | Polyclonal | 1/200                | Novus Biologicals                                         | NBP1-90777    |
| anti-vimentin, clone V9                      | Mouse      | Monoclonal | 1/100                | Dako<br>Gifted by C. Crozet (INM,<br>Montpellier, France) | M0725         |
| anti-ZO-1, clone 1A12                        | Mouse      | Monoclonal | 1/500                | ThermoFisher Scientific                                   | 33-9100       |
| anti-ZO-1                                    | Rabbit     | Polyclonal | 1/100                | ThermoFisher Scientific                                   | 40-2200       |

| Secondary antibodies                       | Host   | Dilution     | Company                 | Cat #       |
|--------------------------------------------|--------|--------------|-------------------------|-------------|
| anti-Goat IgG Alexa Fluor 594              | Donkey | 1/500        | ThermoFisher Scientific | A-11058     |
| anti-Mouse IgG Alexa Fluor 488             | Donkey | 1/500        | ThermoFisher Scientific | A-21202     |
| anti-Mouse IgG Alexa Fluor 594             | Donkey | 1/500        | ThermoFisher Scientific | A-21203     |
| anti-Rabbit IgG Alexa Fluor 488            | Donkey | 1/500        | ThermoFisher Scientific | A-21206     |
| anti-Rabbit IgG Alexa Fluor 594            | Donkey | 1/500        | ThermoFisher Scientific | A-21207     |
| anti-Mouse IgG Alexa Fluor 488 AffiniPure  | Donkey | 1/500        | Jackson ImmunoResearch  | 715-546-151 |
| anti-Rabbit IgG Alexa Fluor 488 AffiniPure | Donkey | 1/500        | Jackson ImmunoResearch  | 711-545-152 |
| anti-Mouse IgG IRDye 680RD                 | Donkey | 1/20000 (WB) | LI-COR Biosciences      | 926-68072   |
| anti-Rabbit IgG IRDye 800CW                | Donkey | 1/20000 (WB) | LI-COR Biosciences      | 926-32213   |
| anti-Guinea pig IRDye 800CW                | Donkey | 1/20000 (WB) | LI-COR Biosciences      | 926-32411   |



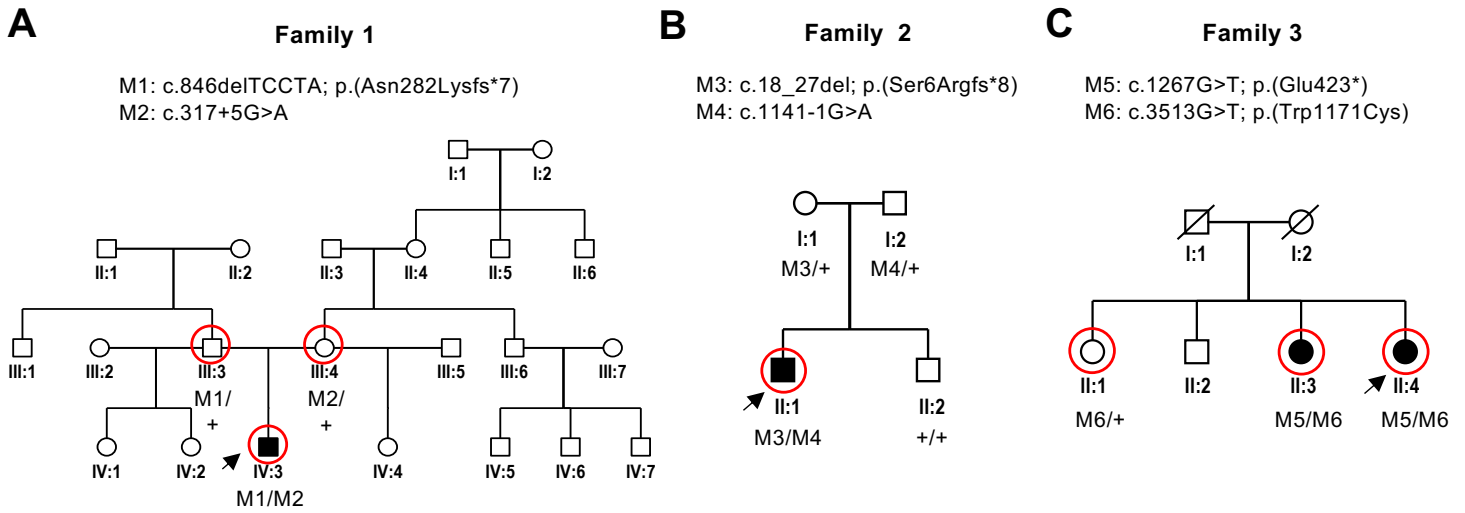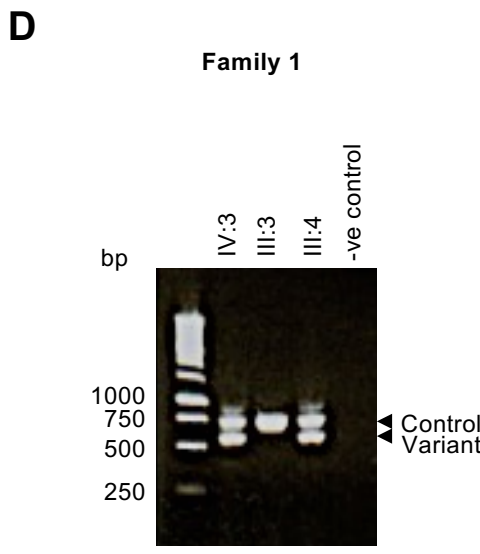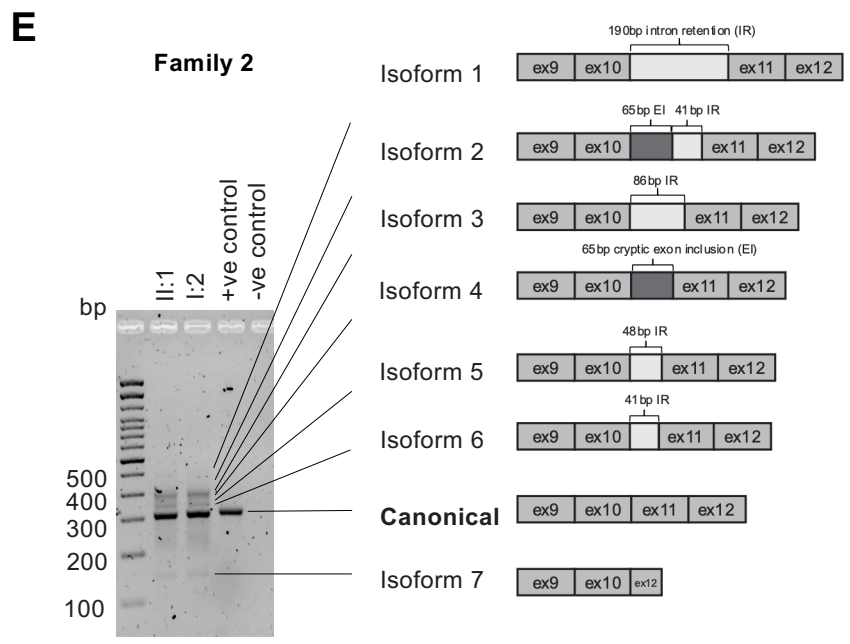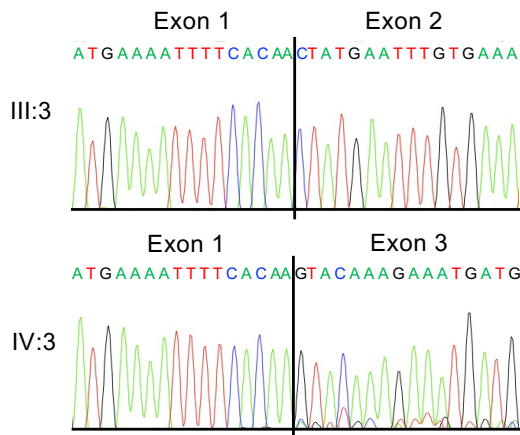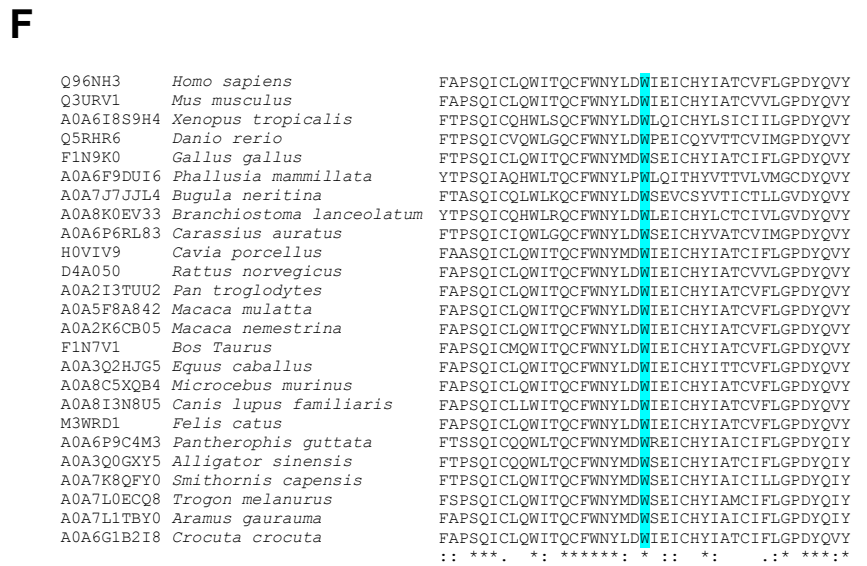

**Supplemental Figure 1. Segregation of *TBC1D32* variants in the three families. A-C)** Pedigrees of the three families carrying *TBC1D32* variants. Open squares and circles represent healthy males and females, respectively; black squares and circles represent affected males and females, respectively; diagonal lines represent deceased individuals; Roman numerals denote the generation number, and Arabic numerals denote the individuals within a generation. Arrows indicate the probands and red circles indicate the individuals for whom WES was performed. **A)** Family 1 is of French origin. Patient 1 (IV:3) is compound heterozygous for the indel variant M1 and the splice variant M2 (M1/M2). The father (III:3) is a carrier of the indel variant (M1/+) and the mother (III:4) is a carrier of the splicing variant (M2/+). **B)** Family 2 is of Italian origin. Patient 2 (II:1) is compound heterozygous for the indel variant M3 and splicing variant M4 (M3/M4), and the unaffected brother (II:2) carries two wild type alleles (+/+). **C)** Family 3 is of Spanish origin. The affected sisters, Patients 3 and 4 (II:3 and II:4), are compound heterozygous for the nonsense variant M5 and the missense variant M6 (M5/M6), whereas the unaffected sister (II:1) carries only the missense variant (M6/+). **D)** RT-PCR analysis of RNA from Patient 1 (IV:3) and his parents (III:3 and III:4) using primers in exons 1 and overlapping the junction of exons 5 and 6 to evaluate the impact of the *TBC1D32* splicing variant M2. The upper band represents the control allele, and the lower band represents the M2 allele. Sequencing electropherograms showing the exon 1 and 2 junction following RT-PCR analysis of individual III:3 (who does not carry the M2 variant) and the exon 1 and 3 junction in the proband IV:3 due to exon 2 skipping. The vertical line represents the beginning of the divergent sequences between the proband and his father. **E)** RT-PCR analysis of RNA isolated from Patient 2 (II:1), his father (I:2), and a control, using primers overlapping the junction of exons 9 and 10 (forward) and exons 12 and 13 (reverse), to analyze the effect of the M4 variant. A single amplicon of 310 bp, corresponding to the canonical splicing form, is observed in the control sample. A similarly-sized amplicon, as well as longer and shorter amplicons, were observed in the patient and his father, corresponding to the 7 aberrant splicing isoforms promoted by M4. **F)** Alignment of the orthologous sequences of the Rab GAP TBC domain on either side of the Trp residue at position 1171 (highlighted in blue), which is altered by the missense variant in family 3, showing the high degree of amino acid conservation across species. From the left to the right column: accession number, species name, and amino-acid sequence. \* indicates a conserved residue, : indicates amino-acids with highly similar properties, and . indicates poorly-conserved amino-acids.

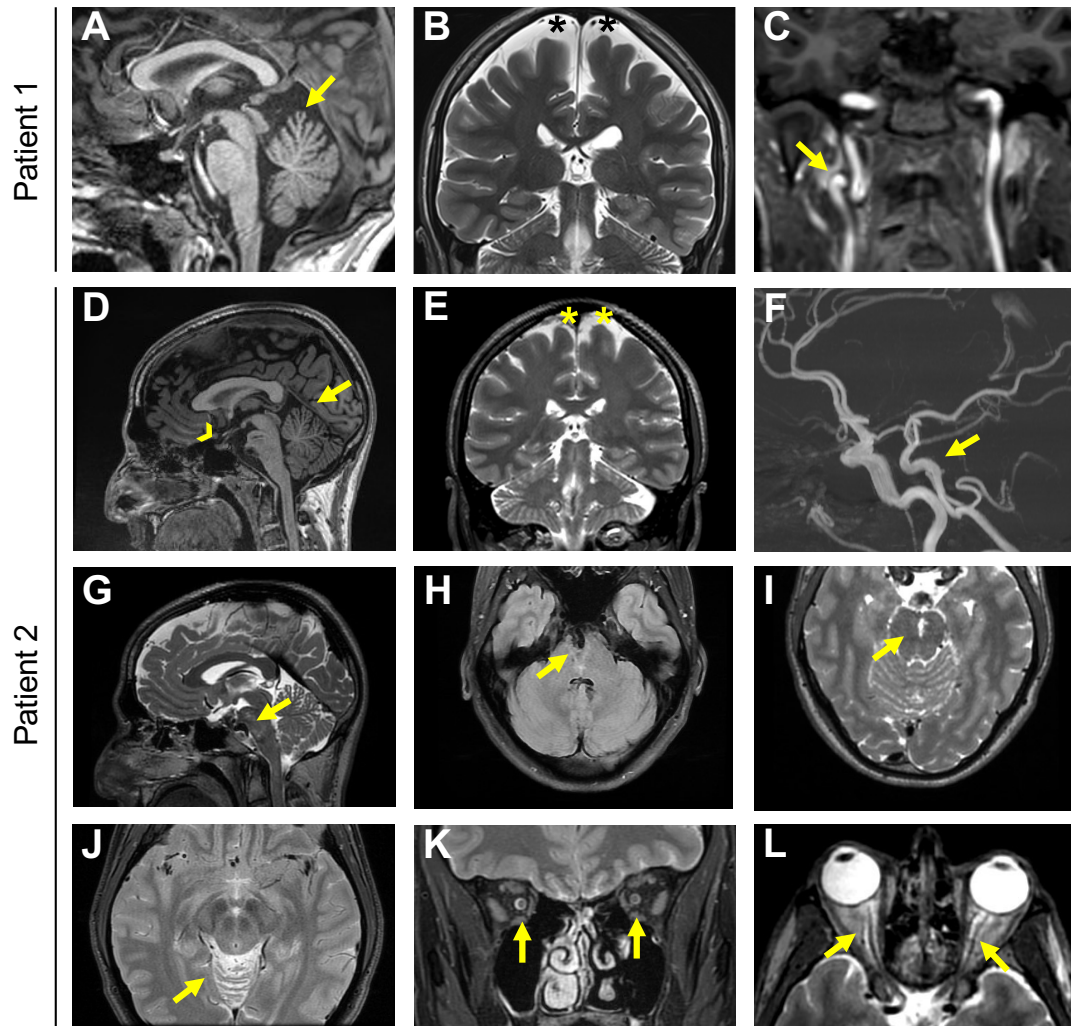

**Supplemental Figure 2. Cerebral MRI of Patients 1 and 2.** A) Sagittal T1 weighted MRI images showing cerebellar atrophy involving specifically the superior part of the cerebellar vermis (arrow). The pituitary gland is normal both for the anterior and the posterior part. B) Coronal T2 weighted images showing diffuse widened subarachnoid spaces suggesting mild cerebral atrophy (black asterisks). C) Coronal T1 weighted imaging showing loop of the cervical segment of the right internal carotid artery, which is an unusual finding in young adults (arrow). D) Sagittal T1-weighted images showing cerebellar atrophy involving specifically the superior part of the cerebellar vermis (arrow). The pituitary gland is normal both for the anterior and the posterior part (arrowhead). E) Coronal T2 weighted images showing diffuse widened subarachnoid spaces suggesting mild cerebral atrophy (asterisks). F) 3D Time of Flight images showing the dolichoectasia of the basilar artery (arrow). G) Sagittal T2 weighted images showing the slight brainstem compression (arrow). H) Axial Fluid Attenuated Inversion Recovery T2 weighted images showing the dolichoectatic basilar trunk in a mid-pons cleft (arrow). I) Axial T2 weighted images showing stretched enlarged perivascular spaces in the mid-pons (arrow). J) Axial T2 weighted images showing the atrophic superior vermis (arrow). Coronal (K) and axial (L) T2 weighted images showing bilaterally enlarged perioptic fluid space in the intraconic and pre-bulbar tracts (arrows).

```

1 ACATACTTTTGGAGGAGCCACAGTCTCGCGAAATGAGACTTGTGACGTCGGGATTAGCTGGGAGACAGGAGACTAGAGACAAGGAGCTGGACGATATTG 100
101 GAGTTGCGGGACGTTTAAAGCAGCGATTTCGGGACTCGCGCTAGTGTAAAGAAAATCTGGACCCTCCCGTCAAAAAATCAGACTCTTTGGGCGACGCTGCCTTT 200
Targeted tbc1d32 Mo1 Targeted tbc1d32 Mo2
201 GAAGAGGCATTTCCCTTGAACAATGCTCATTTTTCTTCTGAGGATGAATCTTCTGAGTCCATGGTTAGACAGTTGCTGCAGAGTATAAAAGAGAGA 300
M S H F S S E D E S S L Q S M V R Q L L Q S I K E R
301 TTAGCAAGTGCCTCCCTGTGTAATGTGCTGAAGAGACTACTGCACTGGAGGAGACAGATGAGCATTTCACAACATGAACTAGTCAAGTACCTTC 400
L A C S A P S V E C A E E I L L H L E E T D E H F H N Y E L L V K Y L L Q
401 AACACTACATCAAAAGCACCTTGGGCTCTGTAATAGAAGAGGAGACGAAAAATGCACCATTGCCTCAAAGTCAGGGGAAGGGCTGGATATGACACGCT 500
H Y I K S T L G S V I E E E T E K C T I A Q S Q G E G P G Y D T L
501 TGTACATCATGTCACCAGAAGAACTCGTGAATCCAAAGAGATGACAGAAATGATGCATTCTACTAAAGAATGTTATGATGGCTGTTGTGGAATCGCTTCTC 600
V H H V T R R T R E S K E Y A E M M H S L K N V M M A V F T S L A K R
601 AATAAATTTGAAGAAGATCAGGCCAAAATAGAGAACTACACAAAAAAGCACTTTTGAACAACATCTGGACGCTACAGTGATACTTTCAGACAGTG 700
N K F P E E A D Q A K N R E L H K K S T F E Q H T G R Y S D D N C S D S D
701 ACTCTTCTTTAAATCAAGTTTACACCTTCATGAACACAGAGCAATGCAACTTATCGAGAGCAGCTGGATCTTAGCCAACCTGTAGAGGTAAAGAGGA 800
S S F N Q S Y T F M N T E Q L Q L I A E Q L D L S Q P V E V R R E
801 GGCAATGCAAACTCTGCTTGCACCTCCATGATGTTCTCAAATGTAAGCTGGAATATTCTTCAAAAAACCTCATGCTCCCTTGCAGATCCA 900
A M Q T L C S A P S D V L K C E S W N I L Q K N L M L T S C L L P
901 GACTCCAGCTTTACAGAGCGGATTTTGGGTTTTATGCAAAAGACATTTCTTCTTCCACTCAGCATGGCAAGAGAAGTTTACTAGTTTACGCAAAC 1000
D S T F T E R L R F Y A K T F S S S P L S M A R E V F T S L A K H
1001 ATCTAATTTGTCATTTATTTCAAGAGAATTTCCAAATTTTATATCAATGGTATAGAATCACAACCCAGAAATTTGCTGTTGAAAAGAT 1100
L E L T S F I S R E Y S K F L L S N G I E I T N P E I V R L L K K I
1101 TCGGCTTTTGAATGACTATCAGAAGGAACCCATCGTTCTGGATAAGACATCCAGAAAATATATGGAAGAAATTTGGAAGCACTGTCTTTTA 1200
R L L N D Y Q K E A P S F V M R H P E K Y M E E I V E S T L S C L
1201 TCAGTTGTTCAAGACTCAAGCTCACCTTCAAAAATCTTCTGGATCCAGCCTTCTCATGGCCTTGATGATCCCAAAGCATTTAGTTTAAAAAATGGA 1300
S V V Q D S S S P S Q I F L D P A F F M A L I D P K A A L I W F K K W M
1301 TGCATGCTACTATAGCAGAATGTGGTACGGCTGGAAAAAATAAAACTATGATTGTTGACAGTATTGAACAGTCTTTTACTTTGAA 1400
H A Y T A T A G S R T V V L R L L E K K Y K T M I V A A I E Q C F Y T A T F E
1401 ATCTTCAAAAGAAGGATTTCAAGAAAATCCAAAACCACTGCTCCACAACATTTATACTAAAACAGAAGACATTTTACACAGAGAAGAAATACAT 1500
S S F T Q E N S K T T V V P Q H I Y T K Q K T F Y T R R E L H
1501 TATTTACTTTGTCATTCCCTCAGTCTCTTAGGAAAATTTGTGATATATAAACATGGCAGAAGATTATTCCTCTTAAGTGAAAAACAGAAAAGAGG 1600
Y L Y F V H S L S L L G K L L I Y K H G R R L F P L K V K N R K E V
1601 TAAITTTCTTGTCTGACATGGTGTGCTATTGTCATATGTCATGGTGTATTGTCAAAACCGTCCAAAAGGGCATTGGAACTTATGAGGATTTATGC 1700
I S L S D M V V L F T V N I M V Y C P N G P K R A L G T Y T A G Y Y A
1701 ACCCTCAACTTTGGCAATGGAGGCTTATGATGCTCTGTGATGCAAGAAATGCTGGGGAATGCTGTATACCTGGTGTAGTTGTATGATACTCTCTG 1800
P S T L A M L C D C D C A G E C L Y T G V T G D T L L
1801 GGCCAATACAAAAGCTTCTGAAAAGGAAAAAGTTTCATGTGAATTTGTGATGAAAACACCTTGACTTATATTTGCTGATATTTTAGCAAGGATTGCATCA 1900
G P I Q K L L K G K K V H V N C D E N T L T Y I A D I L A R I A S T
1901 CTGAAGGAGGACGTTCTTCTTCTATGGGAAAAGTGGACTGTGCAAAAGACAGCATTTGAGTGCTCATACCATAGCCATTTCACTAAGAGCT 2000
E G G G F L L L Y G E K V D C A K D S I V G A H T I A H F T I A K L
2001 TCTGGATGAAGACATCTCTGATAGTCTGAGTCAAGGTTGCTGCTTCTTCAAAAGTACTTTTATTTGATGCCGCAAACTGATACACATGTGAAA 2100
L D E D I P A L A Q S E V L A L K S T F I F V C R Q M Y H C T C E
2101 GGACTCCATGTTTATTTCTTATTCGACTGCATGAATGCATTGCGGAAGCATGGAGAAAAGACTGCTTTTCTGTGCAAAAGGACTCCAACACCTGTTGCTG 2200
G L H V F I P Y R L H E C I A E A W R K T A F L S E R T P T P V A G
2201 GAGTGCCTTCCCTTATCATGAAAGCCAGGAATCACTTGGGACGGAGCTATGGGAGAAATCGCTGCTGGCAACTTATTAATTTTCTGCTACGCGAAG 2300
A A S L G T S E S Q E S L G T E W E E S L L D N L F A A T P R
2301 AGGATTTTACTTTCAACAACTGGCACCATAAATGAATGTGTAATTCATGTTTCAGCAGATTGCTAAAAGCTTCAAGTAAACAGTGTGAGAAA 2400
G L L L T T Q A Q T G T I N E C V N Y M F S R F A K K L Q V N R C T E K
2401 TTTGGTTACGGTGTGATGGTTTACACGGTAGCCACAGCTTTCAGGACCTTAGCCCTTCAAGATCAGGTTATGTTTACGCCCCTTGTACTGATTTAT 2500
F G Y G V M V T Q V A A T A S G A L A L Q R S G Y V Q A L V T D L W
2501 GGTGCTGTTTGAATGTGAAGAGATGATGTGACAGATATACATCCAAACCTACTCCAATGGATCCCATTTGACAGAAGCTGCCAAAAGTCTTTTATAGC 2600
S A L E C G R D D V R H I H P P M D R S C Q K S F I A
2601 AATTGTGAACCTGTTTTCATCCCTATCCACCTGTTGATGAGTCTGAGGAAGCAAGATTATCTTCAAAGAGAATACTCCCTCCGTTGAATGCTTACC 2700
I V N L L S N S Y P P V Y E L L C T G A Q D L S S K E Y E Y L R E M P T
2701 TCTTTTCTGATGTTTTTGGACCGATTGTTTATAAATCTGATGCTAAAAGGAGCTCATTTGTTCAATACGAACAGTCAATATTTGGATTTGCGGT 2800
S F A D V F D R I V V I N S D A K R S S L F N Y E Q S H M F G L R L
2801 TACTGAATGTTTGTGCTGTAATCTTGACACATTTGCTGTTTTAGAACTCAATATAAAGTATCTGATATACTTTTAAATGCTCAGAGAAAATGTTAT 2900
L N L D T L L L L L E S Q Y K V S D I L L N F A R E N V I
2901 TGAGAGCTCTACAGGCTGGTAAACATATCATTGATGCCCTGTCGGTGAAGAAACACATACTGATTCTGTGAATGTCATTGGTGGACCAATGAG 3000
E S S T G L G N I I I D A L S V E R N H I L I R V N V I G A G P N E
3001 CGTGTTTTACCCCGATCTGATTGAGAATAATGATCCATCTTGGCTTATGTTTTCATCTCATCCATTGCCAAAGTGTATATGTCAGAAATGT 3100
R V L P P R S L I E N N D P Y P W P M F S S H P L P K C Y M S E M C
3101 GTCGAAAGATGACCTCAAACAAGATAGTGAATCTACAAGAACTGTTTTGTAATAAATGTTGATACAAAACCGAAGTGGTGGAGAATGCAAGAAAAT 3200
L K N D L K Q N S E I Y K N L D F T C K N V D T K P N W L E N C R K L
3201 GTTTTGCAAAATATCAAAAACAAACCTGATGAGTTAAGTGAAGTTTTGTGGAGAATTGCTAGAAAATATGTACTATACCTTGGTCAAGTCTCTCC 3300
F C K T I K T K P D E L S G K F C G E L L E K Y V L Y L G Q S P S
3301 AACTGTTGTTTGGTATTGGAATACACGGATGGATATCTCAATYACAGTCTACTGCGGTCAACAACCTGGTGTAAAATTTGTTAAGGTATG 3400
N C C F G H L A E Y T D V D T A T C A T Y Q T L T A V Q Q L G V K I V I V A G
3401 CGAGGCATCTCGGCATTCTGGCAGACCAAGCAGCAGCAACAAGGATTTTCAAGTCTAAAACAGTGTGAGAGCTATCTCAATCTGCAACAGAGTGG 3500
R H L G I L A D A S S E T C G F I L K Q C E S Y L N C T G S G
3501 CCCAAACTCTCATTACGTTATTTGACAGGAAGTTATCCAGGTCAGACTGGTTTGCATCTTCTGTTTTTATGATAATGTTGGGAGATGGGAAGAAAAT 3600
P N S P L R Y L Q G S Y P G H D W F A S S V F M I M L G D G K K T
3601 TCAGAAATTTCTTAGATTCTTAGACTTCTTGCCTCTGCTGCTGCTGCTGCTGCTGCTGCTGCTGCTGCTGCTGCTGCTGCTGCTGCTGCTGCTGCT 3700
S E F L R I F T T C T A G A T T C T A C S A Y A T C T G W L P R L H M S K H L P D N I A Q S
3701 CTGGAATTCATCCCATATATYACTGTACAGCACTAATGAAATGCTGTTGAAATCAGAGGTCGCACTCGTCTTTTCAAGCTTCCGATATGCTGGTTT 3800
G I H Y C T A T A C H Y I A E M L T L K S E V P L V F S A C F R M S G F
3801 TACTCCTTCCAGATTTGCCAGCACTGGTTAAGTCAAGTCTTCTGGAATTACCTAGACTGGATTGATCTGTCATTACATTGCTGTATGATCATCTCTC 3900
T P S Q I C Q H W L S Q C F F W N Y L D W I Q I C H Y I A V C I I L
3901 GGACAGATTACCAAGTGTACATGTTATTGCTATATTTAAGCACCACAGCAAGAAATTTGCAACACACACAACCAAGCACTGCAGGTTTTTCTGA 4000
G P D Y Q V Y Q I A I F K H L C A G Q A E A I T L Q H T Q T Q D L Q V T L K
4001 AGGAGGAAAGCATCAATGGATTTCAAGTTGGCAGTTACCTGGAGTACATGGAAAGCTTAGAACAATTTACAGACCAATGGTGTAAAAGAAATGAGAAA 4100
E E A I N G F Q V G S Y L E Y M E S L E Q I Y R P M V L K E M R N
4101 CTCTGTAATACAATGA 4116
S V I Q

```

Supplemental Figure 3. *Xenopus tbc1d32* cDNA. The *Xenopus laevis tbc1d32* cDNA was cloned by RT-PCR from *Xenopus* embryo RNA extracts. The start and stop codons are in bold and underlined. Targeted sequences of each *tbc1d32* morpholino are underlined. The predictive protein sequence is indicated under the coding sequence. In red are indicated mismatches with the *Xenopus laevis tbc1d32* predictive sequence of the NCBI EST database (accession # XM\_041562734.1).

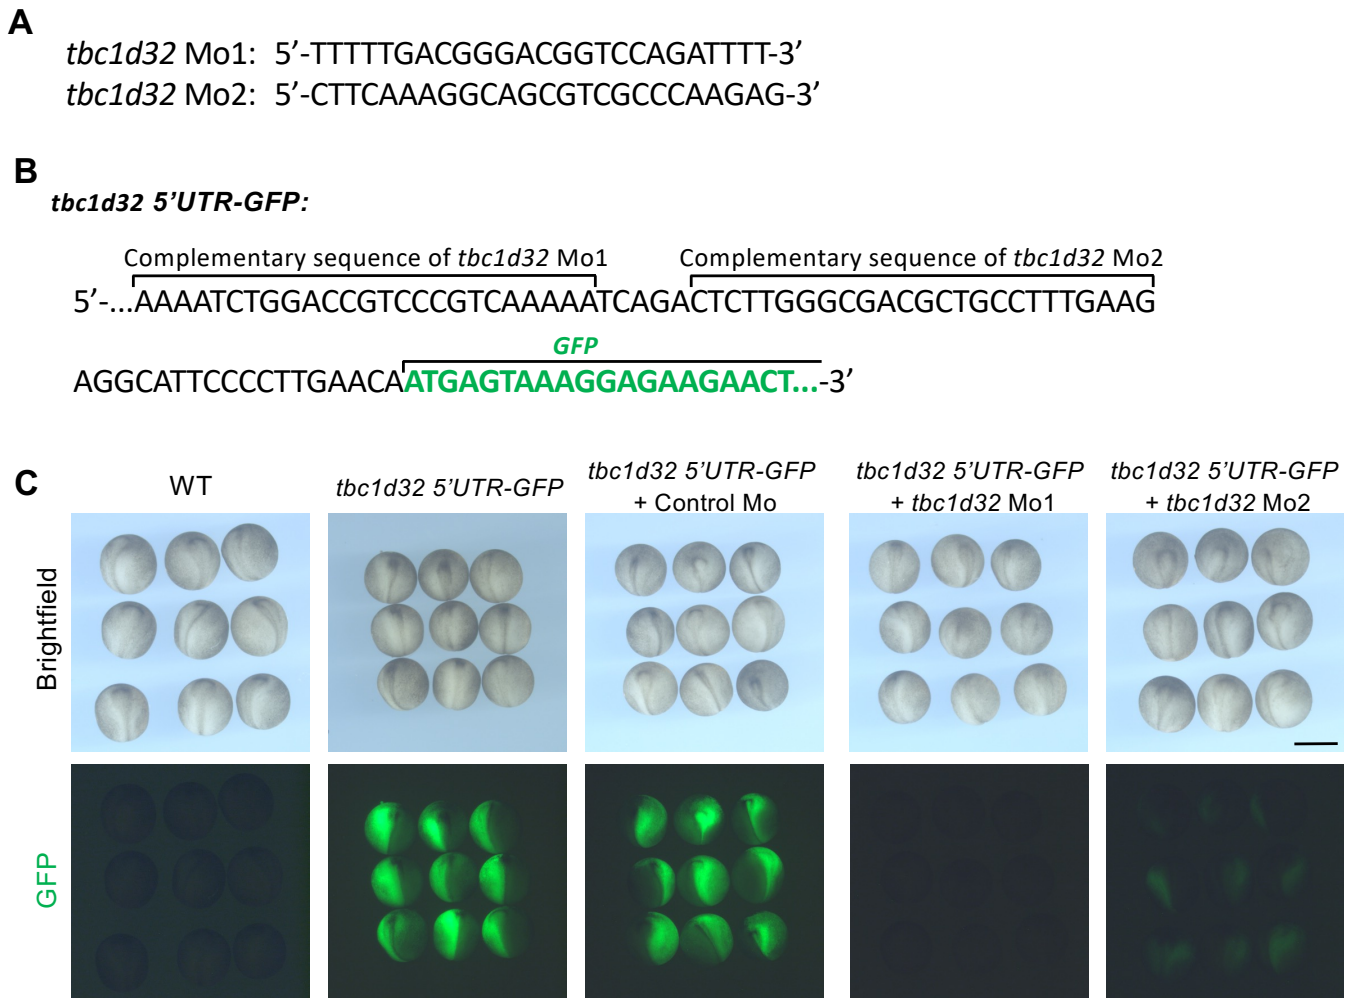

**Supplemental Figure 4. *In vivo* validation of *tbc1d32* Mo efficiency.** **A)** Sequences of both *tbc1d32* morpholinos (Mo). **B)** Schematic representation of the chimeric constructs containing a *GFP* sequenced fused downstream of the *tbc1d32* 5'UTR containing the Mo-complementary sequences [*tbc1d32* 5'UTR-GFP]. **C)** *In vivo* GFP fluorescence was analyzed at stage 19 following co-injection of the indicated Mo and *GFP* mRNA constructs. Upper panels: brightfield images of the embryos. *tbc1d32* Mo1 and *tbc1d32* Mo2 inhibited GFP translation from *tbc1d32* 5'UTR-GFP construct, whereas the control Mo did not. Scale bar = 1 mm.



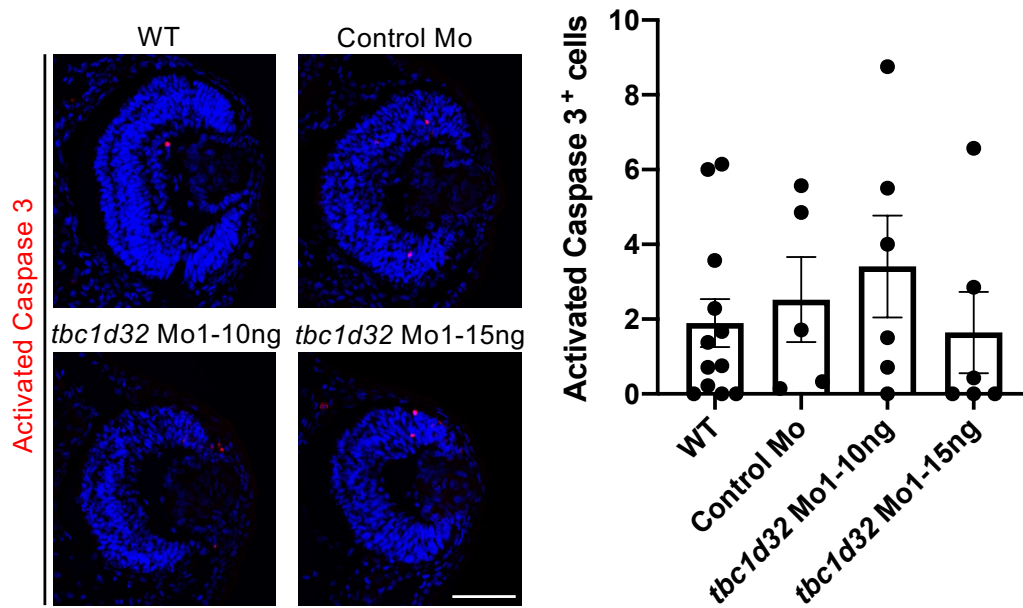

**Supplemental Figure 5. Cell death assay in *Xenopus* embryos following *tbc1d32* Mo injections.**

Activated caspase 3 immunolabelling on retinal sections of wild type embryos (WT), control embryos injected with a standard Mo (Control Mo), morphant embryos injected with 2 doses of *tbc1d32* Mo (10 ng or 15 ng). Scatter plots with bars represents the mean number of activated caspase 3+ cells per section for each condition, each dot corresponding to one embryo. Data are represented as mean  $\pm$  SEM. Scale bar = 40  $\mu$ m.

A

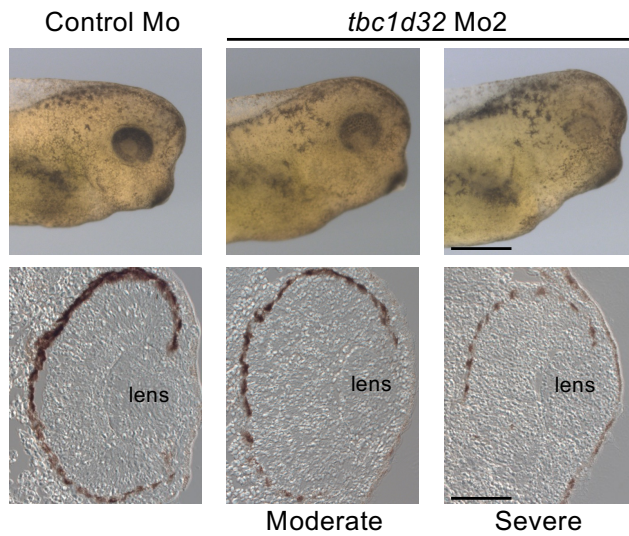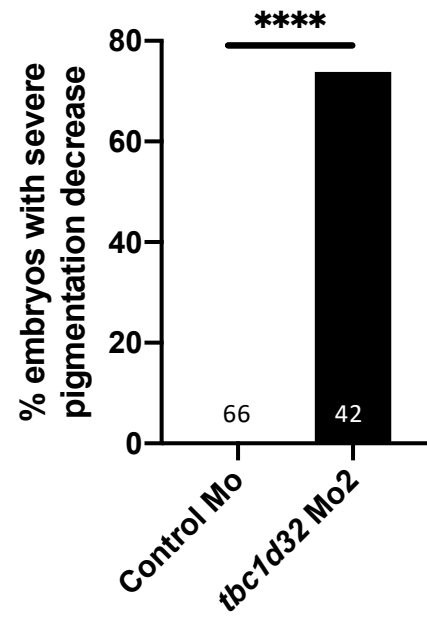

B

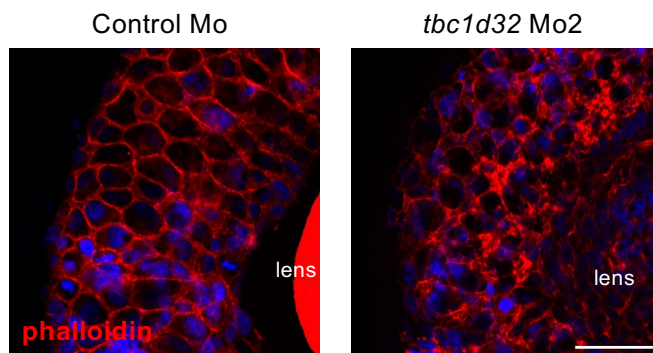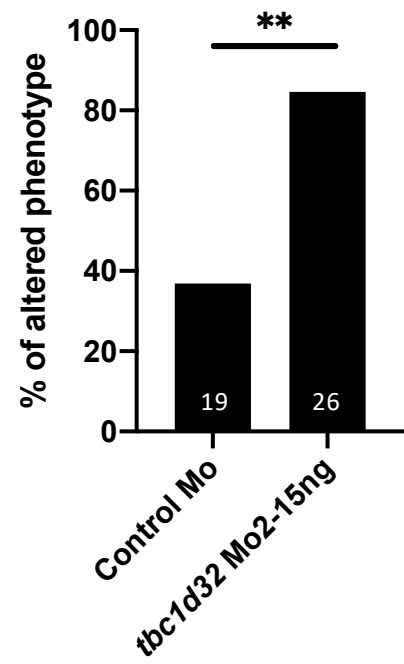

**Supplemental Figure 6. *Xenopus* RPE phenotype in *tbc1d32* Mo2 injected embryos.** A) Upper panels, lateral views of the head of one control and two morphant embryos with moderate and severe phenotypes (anterior to the right). Lower panels, transverse retinal sections of control and morphant embryos (dorsal side up). The histogram represents the percentage of embryos with a severe decrease in pigmentation among control (control Mo), and morphant (*tbc1d32* Mo2) groups. B) Phalloidin staining of filamentous actin on dissected eyes of control or Mo2 morphant *Xenopus* embryos at stage 35-36. The total number of embryos analyzed per condition is indicated in each bar. \*\*\*\* $p < 0.0001$ , \*\* $p < 0.01$ ; Fisher's exact test. Scale bars = 400  $\mu\text{m}$  for whole mounts, 60  $\mu\text{m}$  for sections in A, and 20  $\mu\text{m}$  in B.

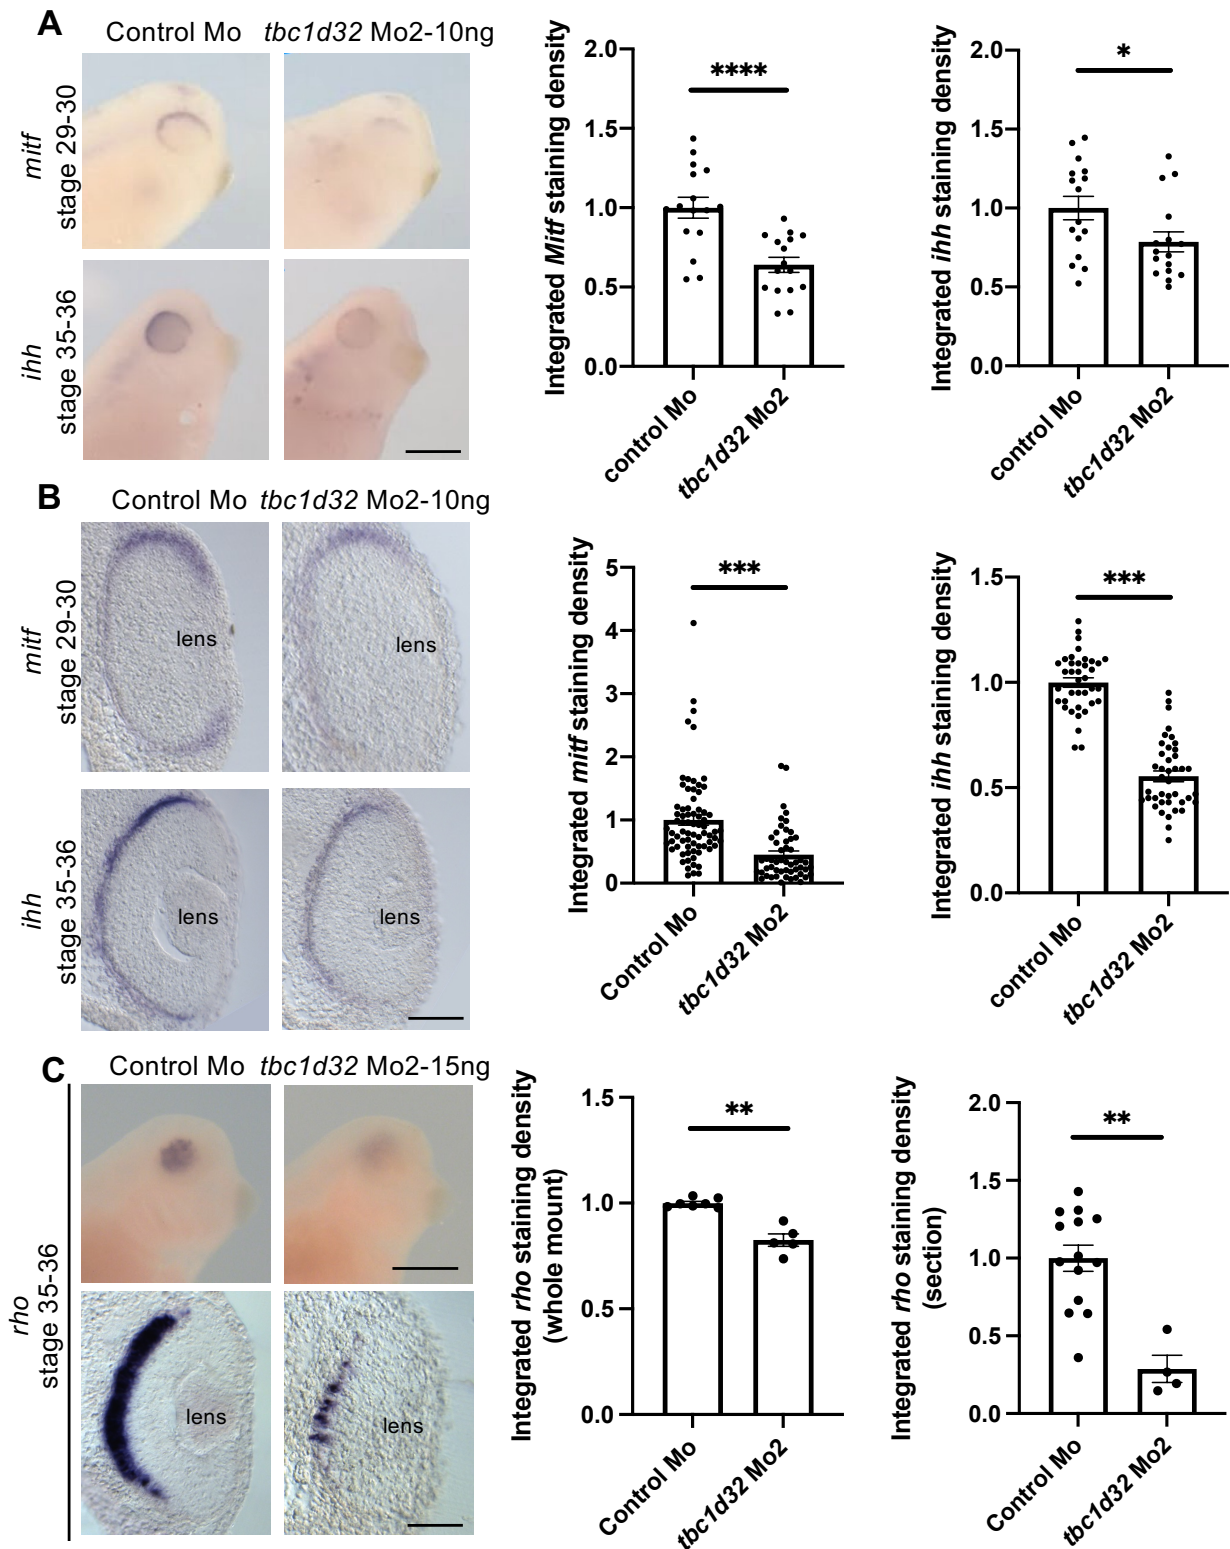

**Supplemental Figure 7. *Xenopus* RPE marker expression following *tbc1d32* knockdown.** A) Whole mount *in situ* hybridization against *mitf* or *ihh* on embryos injected with control Mo or *tbc1d32* Mo2 (lateral views of the head, anterior to the right). Scatter plots with bars represent quantification of the integrated density of *mitf* or *ihh* staining per eye relative to control Mo; each dot corresponds to one eye. B) Representative images of *mitf* or *ihh* staining on retinal sections of control or morphant embryos (dorsal side up). Scatter plots with bars represent quantification of integrated density of *mitf* or *ihh* staining relative to control Mo on retinal sections; each dot corresponds to one section. C) Upper panels, whole mount *in situ* hybridization against *rhodopsin* (*rho*) in embryos injected with control Mo or *tbc1d32* Mo2. Lower panels, transverse retinal sections of control and morphant embryos (dorsal side up). The scatter plots represent the quantification of the integrated density of *rho* staining relative to Mo2; each dot corresponds to one eye or one section. For all scatter plots, data are represented as mean  $\pm$  SEM. \* $p < 0.05$ ; \*\* $p < 0.01$ ; \*\*\* $p < 0.001$ ; \*\*\*\* $p < 0.0001$ ; Mann and Whitney test. Scale bars = 400  $\mu$ m for whole mounts and 40  $\mu$ m for sections.



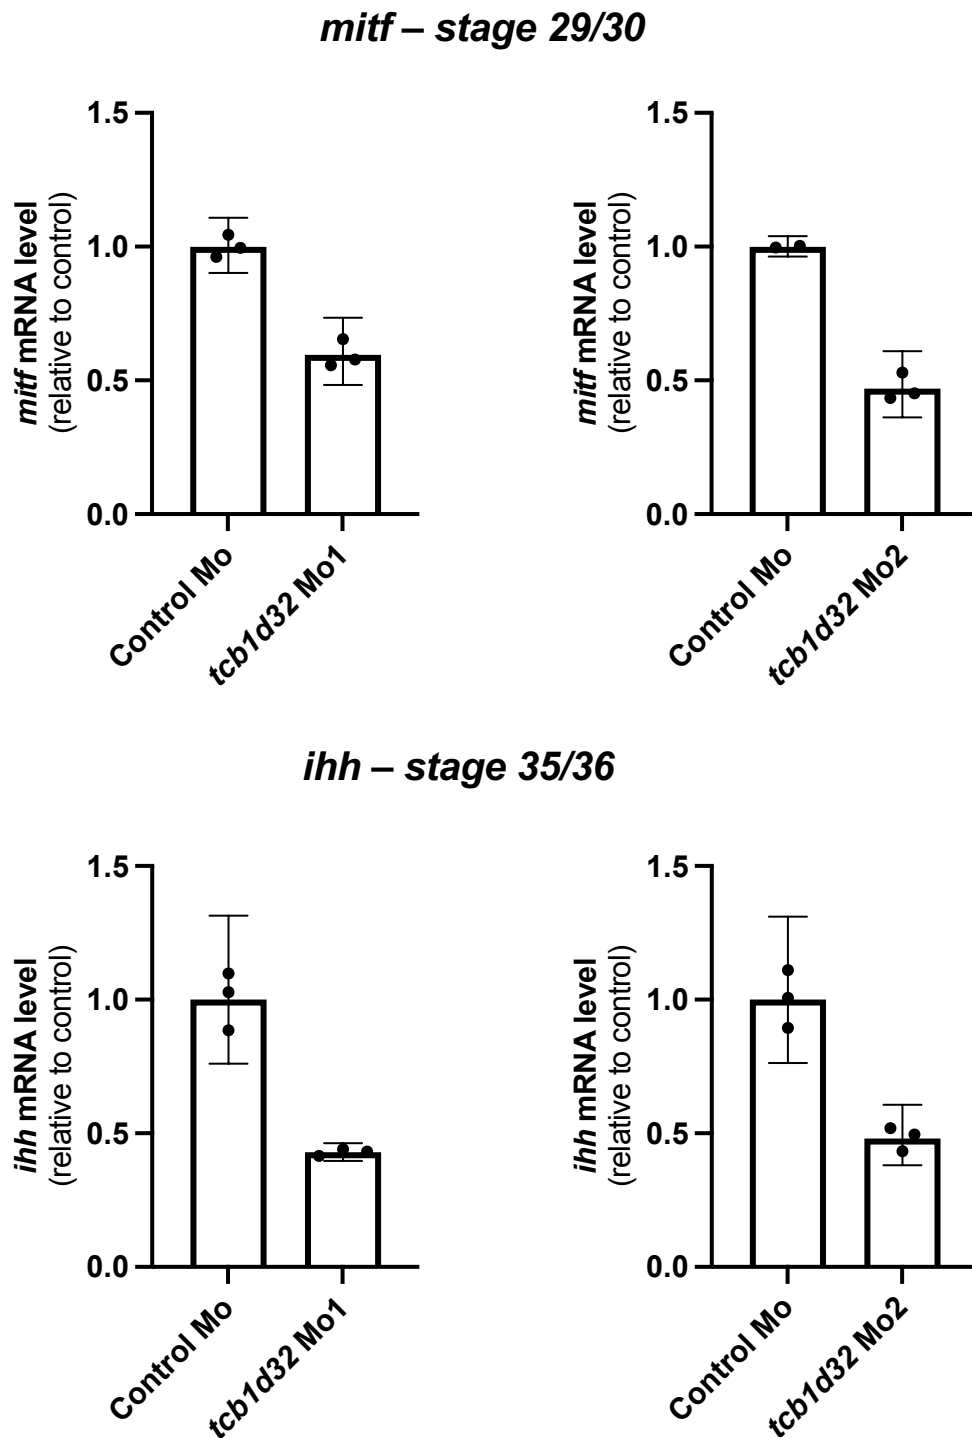

**Supplemental Figure 8. *Xenopus* RPE marker expression following *tbc1d32* knockdown.** qPCR analysis of *mitf* and *ihh* expression, in optic vesicles at stage 29-30 and whole eyes at stage 35-36, respectively, injected with control Mo, *tbc1d32* Mo1 or *tbc1d32* Mo2 (15ng). Data are represented as geometric mean with 95% CI; n = 3 technical replicates.

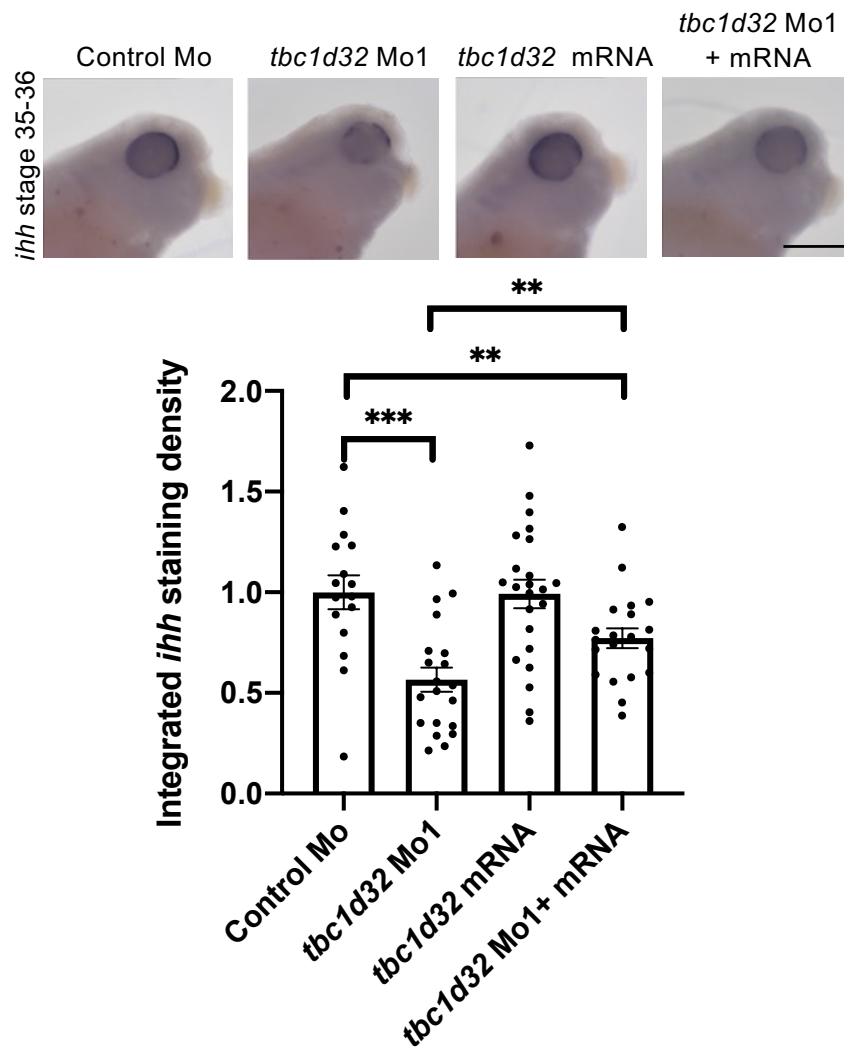

**Supplemental Figure 9. *ihh* expression following *tbc1d32* Mo and mRNA co-injection.** Whole mount *in situ* hybridization against *ihh* on stage 35-36 embryos injected with standard Mo, *tbc1d32* Mo1, *tbc1d32* mRNA, and *tbc1d32* Mo + *tbc1d32* mRNA (lateral view of the head, anterior to the right). Scatter plot with bars represents the quantification of *ihh* staining integrated intensity per eye relative to control Mo, each dot corresponding to one eye. Data are represented as mean  $\pm$  SEM. \*\* $p < 0.01$ ; \*\*\* $p < 0.001$ ; Mann and Whitney test. Scale bar = 400  $\mu$ m.

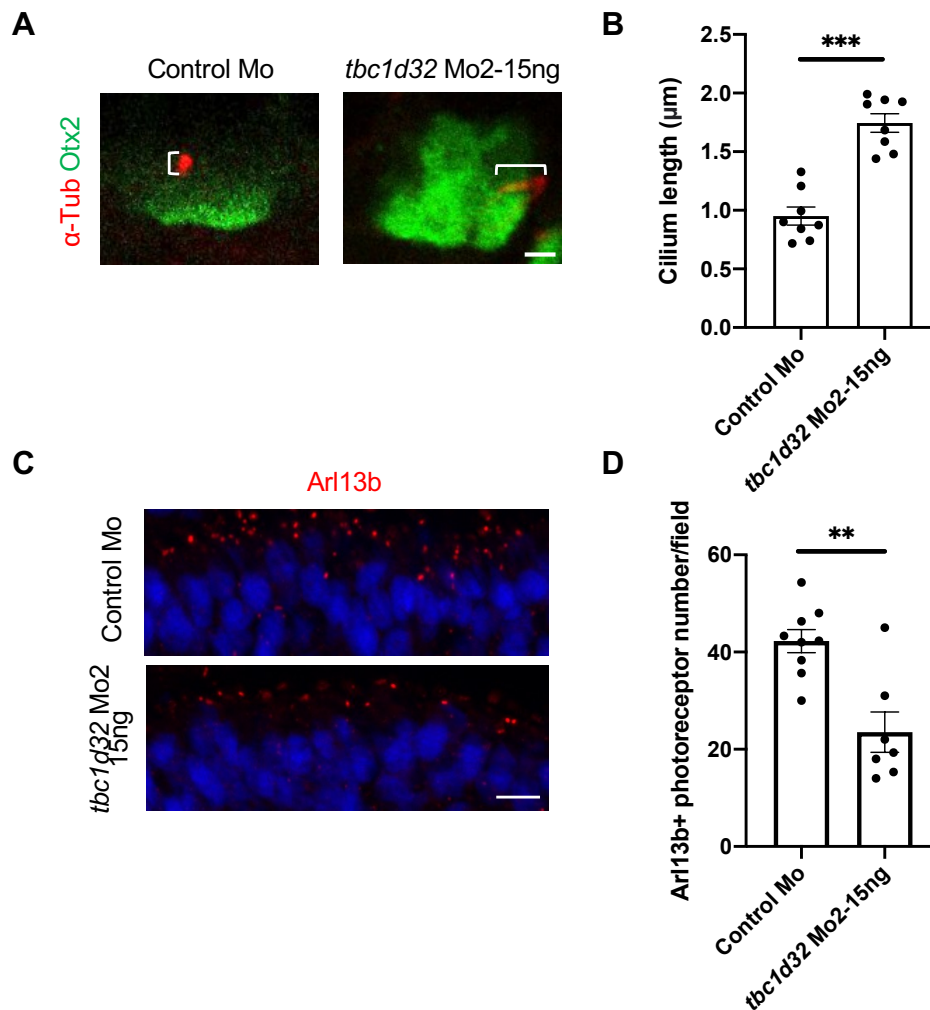

**Supplemental Figure 10. Impact of *Xenopus* knockdown with *tbc1d32* Mo2 on retinal ciliogenesis.** **A)** Immunolabelling of acetylated  $\alpha$ -Tub and Otx2 showing a primary RPE cilium (delineated with brackets) on retinal sections of stage 35 embryos injected with a control Mo or with 15 ng of *tbc1d32* Mo2. **B)** Scatter plot with bars showing the mean cilia length in RPE cells. Each dot corresponds to the mean length for one embryo. **C)** Immunolabelling of Arl13b showing the photoreceptor connective cilium on retinal sections of stage 35 embryos injected with a control Mo or with 15 ng of *tbc1d32* Mo2. **D)** The scatter plot with bars shows the mean number of Arl13<sup>+</sup> ciliated photoreceptors in one field of the central retina. Each dot corresponds to one embryo. All data are represented as mean  $\pm$  SEM. \*\* $p < 0.01$ , \*\*\* $p < 0.001$ ; Mann and Whitney test. Scale bars = 2  $\mu\text{m}$  in A and 20  $\mu\text{m}$  in C.

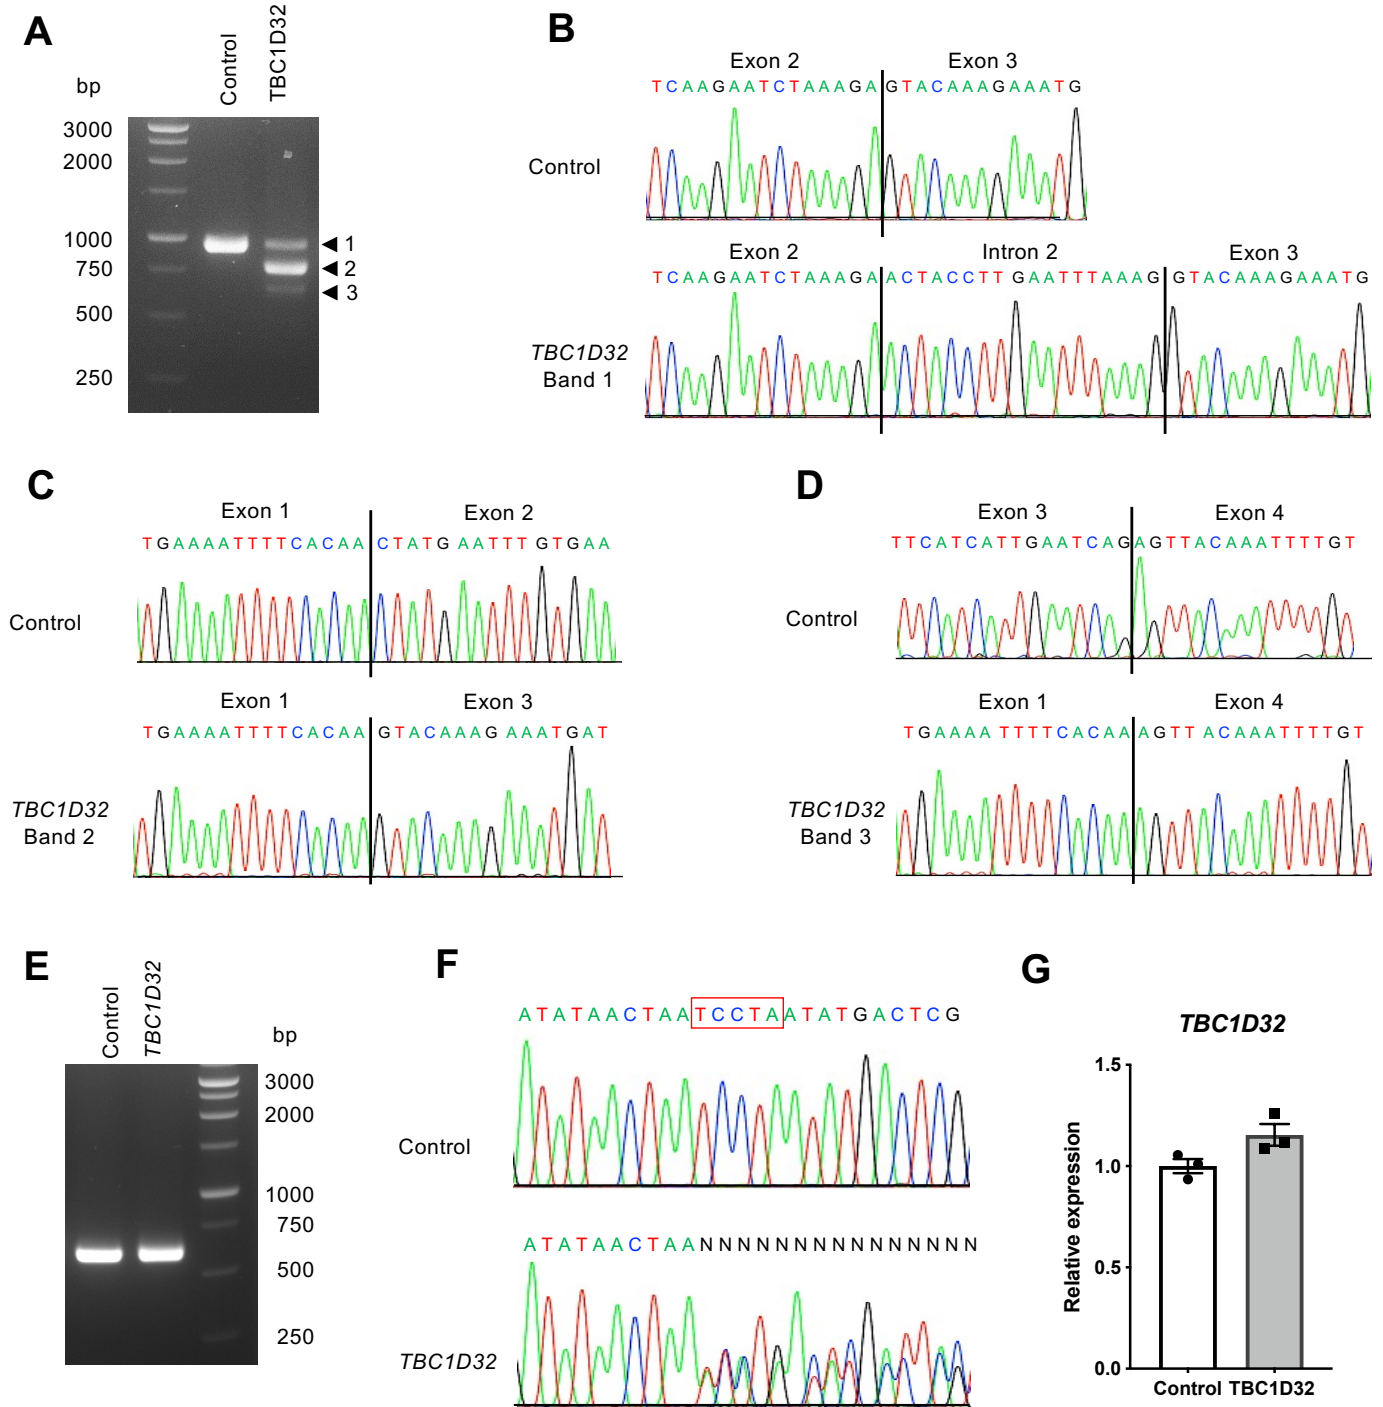

**Supplemental Figure 11. Effect of *TBC1D32* variants carried by Patient 1 at the mRNA level.** **A)** RT-PCR analysis of RNA isolated from control and Patient 1 fibroblasts using primers specific to exons 1 and 8 to further analyze the effect of the c.317+5G>A variant. A single amplicon of 931 bp is observed in control fibroblasts. Three amplicons of 949 bp (Band 1), 769 bp (Band 2) and 591 bp (Band 3) are observed in *TBC1D32* fibroblasts. **B)** Sequencing electropherograms (A, T, C, G) following subcloning of Band 1 shows the insertion of 18 bp of intron 2 between the exons 2 and 3 in comparison to the control sequence. **C)** Sequence electropherograms of Band 2 shows the skipping of exon 2 in comparison to the control sequence. **D)** Sequence electropherograms of Band 3 shows the skipping of exons 2 and 3 in comparison to the control sequence. The vertical lines in B, C and D represent the exon-intron junctions. **E)** RT-PCR analysis of RNA isolated from control and Patient 1 fibroblasts using primers specific to exons 6 and 11 to assay the effect of the c.846delTCCTA variant. A single amplicon of 604 bp is observed in control and *TBC1D32* fibroblasts. **F)** Sequence electropherograms show the deletion of the TCCTA sequence (boxed in red) and subsequent frameshift in *TBC1D32* fibroblasts as compared to controls. **G)** qPCR analysis of *TBC1D32* expression levels in control (black bars) and *TBC1D32* (grey bars) fibroblasts. Data are represented as mean  $\pm$  SEM.

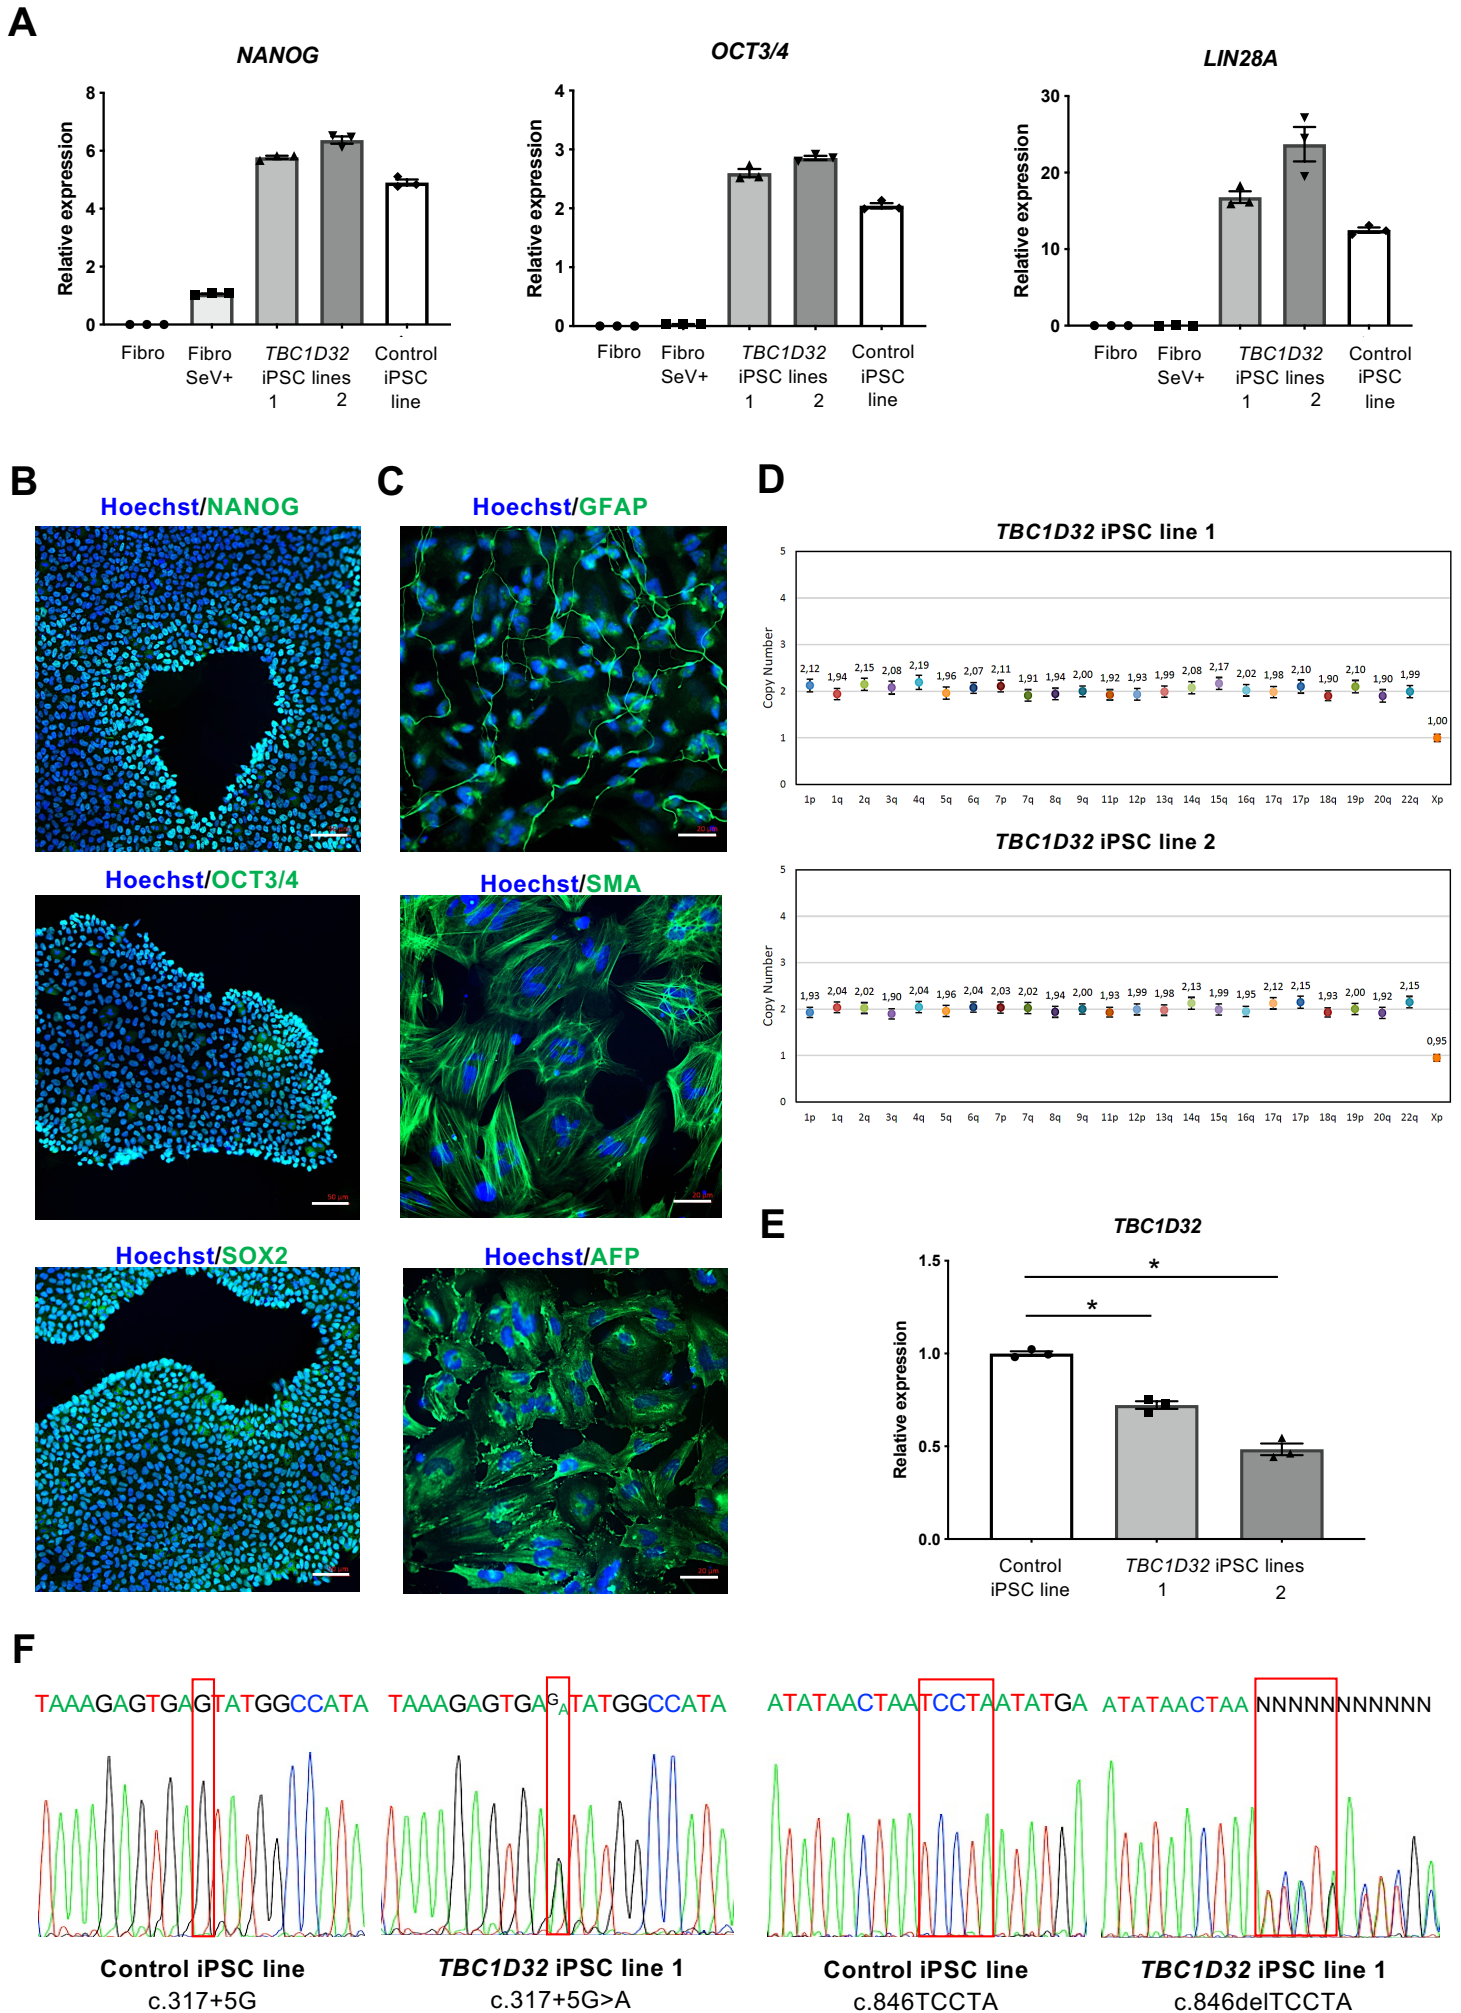

**Supplemental Figure 12. Quality controls of *TBC1D32* iPSC lines from Patient 1.** **A)** qPCR analysis of the pluripotency markers *NANOG*, *OCT3/4* and *LIN28A* in fibroblasts, fibroblasts transduced with Sendai reprogramming vectors (Fibro SeV+; light grey bars), *TBC1D32* iPSC lines 1 and 2 (dark grey bars), and a control iPSC line (black bars). Data are represented as mean  $\pm$  SEM. **B)** IF analysis of the pluripotency markers NANOG, OCT3/4 and SOX2 (in green; nuclei labelled in blue) in *TBC1D32* iPSC line 1. Scale bars = 70  $\mu$ m. **C)** IF analysis of the germline markers glial fibrillary acidic protein (GFAP; ectoderm), smooth muscle actin (SMA; mesoderm) and alpha-fetoprotein (AFP; endoderm), following EB differentiation of *TBC1D32* iPSC line 2. Scale bars = 40  $\mu$ m. **D)** Digital qPCR analysis of rearrangement hotspots in *TBC1D32* iPSC lines showing a copy number of 2 for all autosomal regions, and a copy number of 1 for the X chromosome. **E)** qPCR analysis of *TBC1D32* expression in *TBC1D32* iPSC lines (grey bars) in comparison to a control line (black bar). Data are represented as mean  $\pm$  SEM; n = 3 technical replicates; p<0.05; Mann and Whitney. **F)** Sanger sequencing of the regions carrying the variants c.317+5G>A and c.846delTCCTA (red boxes) in the *TBC1D32* iPSC line 1 in comparison to a control iPSC line.



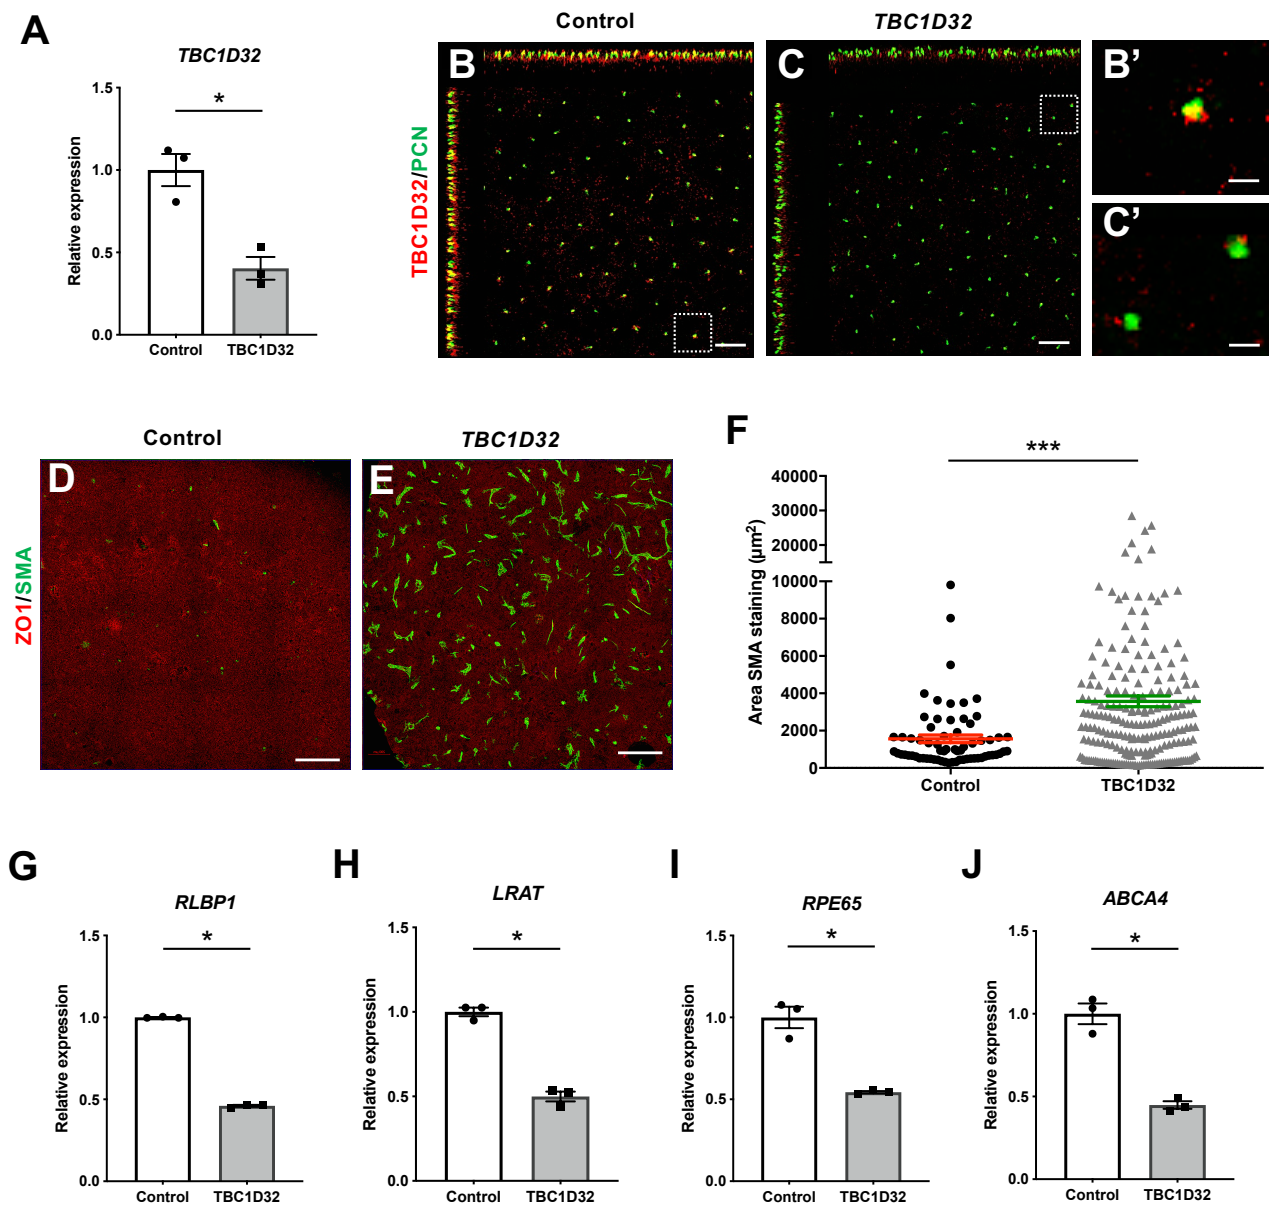

**Supplemental Figure 13. Expression of *TBC1D32* and EMT and visual cycle markers in iPSC-derived RPE.** **A**) qPCR analysis of *TBC1D32* expression in control (black bar) and patient (grey bar) iPSC-derived RPE. Data are represented as mean  $\pm$  SEM;  $n = 3$  technical replicates;  $p < 0.05$ ; Mann and Whitney. IF studies and MIP confocal imaging of *TBC1D32* and PCN expression in control (**B**) and *TBC1D32* (**C**) iPSC-derived RPE. Scale bars =  $10 \mu\text{m}$  **B'**, **C'**) Higher magnification of the boxed cells shown in **B** (scale bar =  $2 \mu\text{m}$ ) and **C** (scale bar =  $2.5 \mu\text{m}$ ), respectively. **D**) A 16 field-montage of a transwell filter of control (**D**) and *TBC1D32* (**E**) iPSC-derived RPE immunolabelled for ZO1 and SMA. Scale bars =  $50 \mu\text{m}$ . **F**) Scatter plot represents the quantification of each area of SMA staining in control ( $n = 67$ ) and *TBC1D32* ( $n = 230$ ) iPSC-derived RPE shown in **D** and **E**. Data are represented as mean  $\pm$  SEM; \*\*\* $p < 0.0005$ ; Student's t-test. qPCR analysis of the visual cycle markers *RLBP1* (**G**), *LRAT* (**H**), *RPE65* (**I**) and *ABCA4* (**J**) in control (black bar) and patient (grey bar) iPSC-derived RPE. Data are represented as mean  $\pm$  SEM;  $n = 3$  technical replicates; \* $p < 0.05$ ; Mann and Whitney.
